# Supplementary material for: High-throughput ultra-performance liquid chromatography-mass spectrometry characterization of metabolites guided by a bioinformatics program
Source: Royal Society of Chemistry journal article supplement (doi:10.1039/c3mb70171a), 2013-05-29
Supplement: c3mb70171a.pdf [file c3mb70171a.pdf]

**Supplementary Table 1.** Features that were found to be differentially regulated in the HCC as defined in figure 4.

| No. | M/Z      | Rt   | Name                                                            | Formula                                                       | Fold | P value | Trend |
|-----|----------|------|-----------------------------------------------------------------|---------------------------------------------------------------|------|---------|-------|
| 1   | 301.0575 | 2.1  | 5-(3,4-Dihydroxy-1,5-cyclohexadien-1-yl)-5-ethylbarbituric acid | C <sub>12</sub> H <sub>14</sub> N <sub>2</sub> O <sub>5</sub> | 1.6  | 0.00003 | ↓     |
| 2   | 113.0255 | 2.11 | 2-Hydroxy-2,4-pentadienoate                                     | C <sub>5</sub> H <sub>6</sub> O <sub>3</sub>                  | 1.5  | 0.00005 | ↓     |
| 3   | 203.0032 | 4.17 | NA                                                              | NA                                                            | 1.7  | 0.00007 | ↓     |
| 4   | 125.0254 | 1.56 | Methyl 2-furoate                                                | C <sub>6</sub> H <sub>6</sub> O <sub>3</sub>                  | 1.8  | 0.00016 | ↓     |
| 5   | 204.9813 | 1.56 | 4-Chlorophenylacetic acid                                       | C <sub>8</sub> H <sub>7</sub> ClO <sub>2</sub>                | 1.9  | 0.00026 | ↓     |
| 6   | 113.025  | 4.62 | Norfuraneol                                                     | C <sub>5</sub> H <sub>6</sub> O <sub>3</sub>                  | 2    | 0.00065 | ↓     |
| 7   | 246.9933 | 2.73 | Vanillic acid 4-sulfate                                         | C <sub>8</sub> H <sub>8</sub> O <sub>7</sub> S                | 1.6  | 0.00071 | ↓     |
| 8   | 192.0668 | 4.26 | (3-Arylcarbonyl)-alanine                                        | C <sub>10</sub> H <sub>11</sub> NO <sub>3</sub>               | 1.8  | 0.00078 | ↓     |
| 9   | 175.0253 | 4.62 | Ascorbic acid                                                   | C <sub>6</sub> H <sub>8</sub> O <sub>6</sub>                  | 1.9  | 0.00086 | ↓     |
| 10  | 258.9946 | 1.85 | NA                                                              | NA                                                            | 1.5  | 0.00103 | ↓     |
| 11  | 283.08   | 4.62 | p-Cresol glucuronide                                            | C <sub>13</sub> H <sub>16</sub> O <sub>7</sub>                | 2.2  | 0.00106 | ↓     |
| 12  | 197.047  | 2.61 | 3,4-O-Dimethylgallic acid                                       | C <sub>9</sub> H <sub>10</sub> O <sub>5</sub>                 | 1.6  | 0.00121 | ↓     |
| 13  | 407.9502 | 4.62 | NA                                                              | NA                                                            | 1.7  | 0.00131 | ↓     |
| 14  | 409.9471 | 4.62 | NA                                                              | NA                                                            | 1.8  | 0.00247 | ↓     |
| 15  | 167.0355 | 2.73 | 3-Hydroxymandelic acid                                          | C <sub>8</sub> H <sub>8</sub> O <sub>4</sub>                  | 1.6  | 0.00375 | ↓     |
| 16  | 188.0113 | 4.51 | NA                                                              | NA                                                            | 2.2  | 0.0039  | ↓     |
| 17  | 428.0051 | 4.62 | NA                                                              | NA                                                            | 1.5  | 0.00392 | ↓     |
| 18  | 187.0051 | 4.51 | NA                                                              | NA                                                            | 2.2  | 0.00422 | ↓     |
| 19  | 107.051  | 4.51 | Benzyl alcohol                                                  | C <sub>7</sub> H <sub>8</sub> O                               | 2.3  | 0.00435 | ↓     |
| 20  | 231.0758 | 4.79 | NA                                                              | C <sub>12</sub> H <sub>12</sub> N <sub>2</sub> O <sub>3</sub> | 1.7  | 0.00524 | ↓     |
| 21  | 112.9866 | 0.45 | Trifluoroacetic acid                                            | C <sub>2</sub> HF <sub>3</sub> O <sub>2</sub>                 | 1.5  | 0.00576 | ↑     |
| 22  | 152.0122 | 2.73 | L-Aspartic acid b-semialdehyde                                  | C <sub>4</sub> H <sub>7</sub> NO <sub>3</sub>                 | 1.5  | 0.00597 | ↓     |
| 23  | 174.9575 | 0.42 | Phosphonoacetate                                                | C <sub>2</sub> H <sub>5</sub> O <sub>5</sub> P                | 1.5  | 0.00625 | ↓     |
| 24  | 315.0745 | 1.83 | L-beta-aspartyl-L-phenylalanine                                 | C <sub>13</sub> H <sub>16</sub> N <sub>2</sub> O <sub>5</sub> | 2.2  | 0.00643 | ↓     |
| 25  | 212.0035 | 4    | Indoxylsulfuric acid                                            | C <sub>8</sub> H <sub>7</sub> NO <sub>4</sub> S               | 1.6  | 0.00715 | ↓     |
| 26  | 335.0106 | 5.62 | NA                                                              | NA                                                            | 1.7  | 0.00917 | ↓     |
